# Supplementary material for: A prognostic score model to determine which breast cancer patients with 1–3 positive lymph nodes after modified radical mastectomy should receive radiotherapy
Source: PubMed Central journal article supplement (PMC5787474; doi:10.18632/oncotarget.21531), 2017-10-05
Supplement: oncotarget-09-385-s001.pdf [file oncotarget-09-385-s001.pdf]

# A prognostic score model to determine which breast cancer patients with 1–3 positive lymph nodes after modified radical mastectomy should receive radiotherapy

## SUPPLEMENTARY MATERIALS

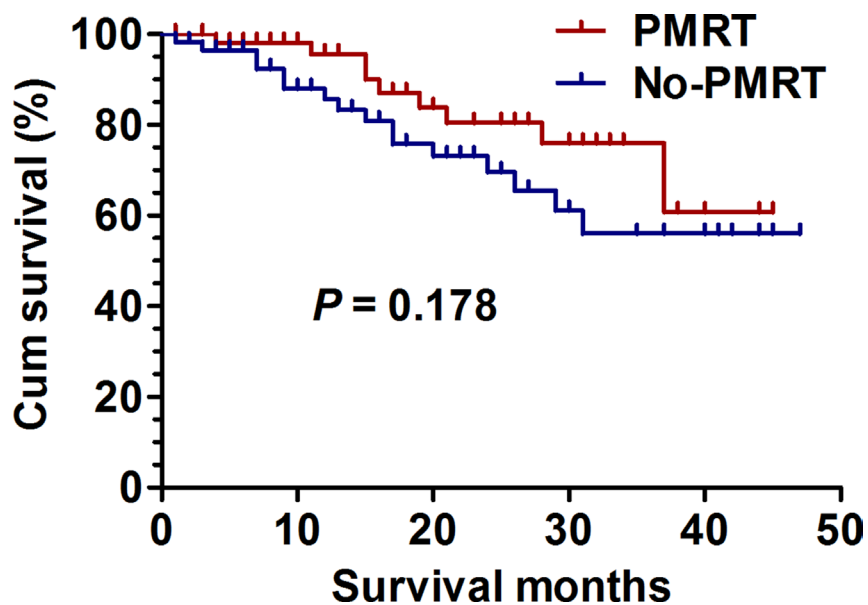

Supplementary Figure 1: OS curves for the patients with prognostic score of 3 ( $\chi^2 = 1.813$ ,  $P = 0.178$ ).

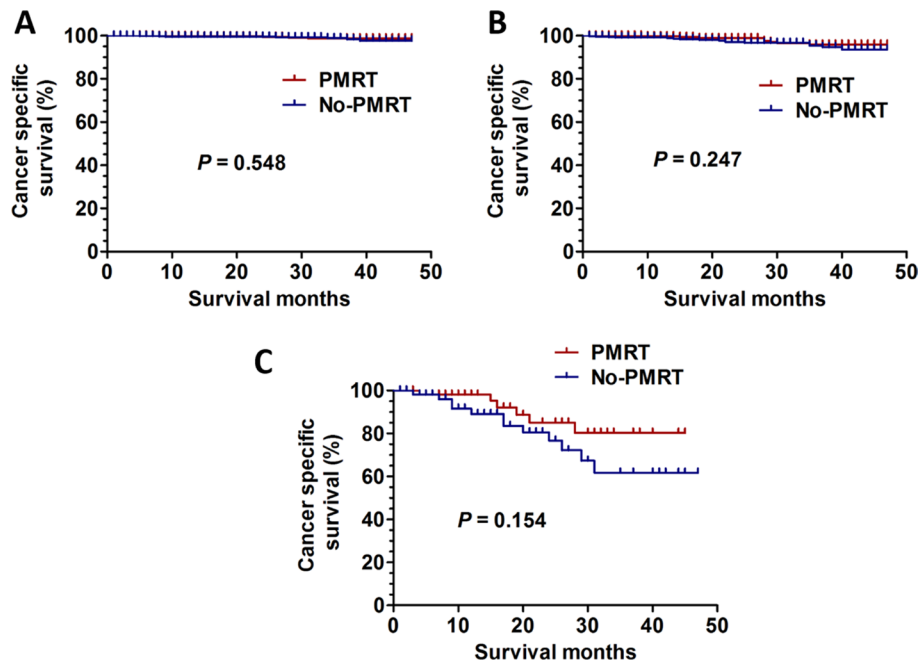

**Supplementary Figure 2: CSS curves for patients with different prognostic scores.** (A) CSS curves for patients with a prognostic score of 0 ( $\chi^2 = 0.362$ ,  $P = 0.548$ ). (B) CSS curves for patients with a prognostic score of 1 ( $\chi^2 = 1.338$ ,  $P = 0.247$ ). (C) CSS curves for patients with a prognostic score of 3 ( $\chi^2 = 2.029$ ,  $P = 0.154$ ).
